# Supplementary material for: Interleukin-1–Receptor Antagonist in Type 2 Diabetes Mellitus
Source: Atypon-hosted journal article supplement (doi:10.1056/nejmoa065213), 2007-04-11
Supplement: nejm_larsen_1517sa1.pdf [file nejm_larsen_1517sa1.pdf]

## Supplementary Appendix

This appendix has been provided by the authors to give readers additional information about their work.

Supplement to: Larsen CM, Faulenbach M, Vaag A, et al. Interleukin-1–receptor antagonist in type 2 diabetes mellitus. *N Engl J Med* 2007;356:1517-26.

## Supplementary Appendix:

### **Muscle Biopsy, RNA Extraction and RT-PCR**

The muscle biopsies were immediately frozen in liquid nitrogen and stored at -80°C until analysis. Total RNA was extracted by the Tri Reagent kit following the manufacturer's description (Sigma-Aldrich). cDNA was synthesized using RevertAid™ H minus First Strand cDNA Synthesis kit (Fermentas) following DNase treatment of the RNA (Promega). Glucose-transporter 4 (GLUT4) and peroxisome-proliferator-activated receptor- $\gamma$  coactivator 1 $\alpha$  (PGC-1 $\alpha$ ) mRNA were quantified using TaqMan Real-Time PCR with probes and primer pairs for GLUT4 and PGC-1 $\alpha$  (Assays-on-Demand Hs00168966\_m1 and Hs00173304\_m1, respectively, Applied Biosystems). Each sample was run in duplicate and the transcript quantity was determined by the standard curve method normalized to cyclophilin A (4333763F, Applied Biosystems) expression.
